# Supplementary material for: Synthesis, characterisation and reactivity of germanium(ii) amidinate and guanidinate complexes
Source: Royal Society of Chemistry journal article supplement (doi:10.1039/b801168k), 2008-01-01
Supplement: b801168k.pdf [file b801168k.pdf]

## Synthesis, Characterisation and Reactivity of Germanium(II) Amidinate and Guanidinate

### Complexes

Cameron Jones,\* Richard P. Rose and Andreas Stasch

#### SUPPLEMENTARY MATERIAL

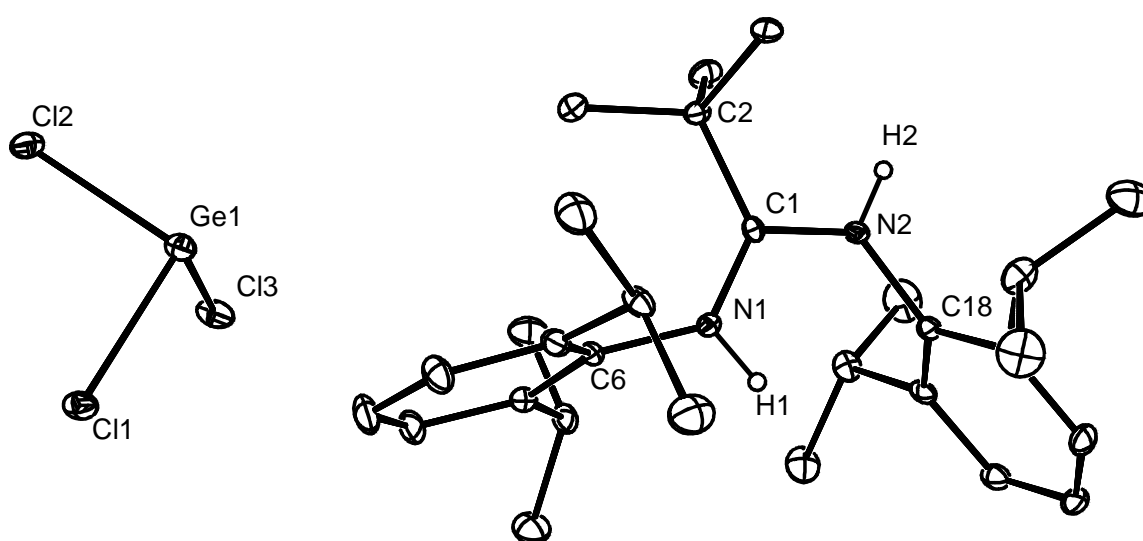

**Figure S1.** Molecular structure of  $[\text{PisoH}_2][\text{GeCl}_3]$  **5** (25% thermal ellipsoids are shown). Selected bond lengths ( $\text{\AA}$ ) and angles ( $^\circ$ ): Ge(1)-Cl(3) 2.2782(11), Ge(1)-Cl(2) 2.3118(11), Ge(1)-Cl(1) 2.3311(11), N(1)-C(1) 1.325(4), N(2)-C(1) 1.319(4), Cl(3)-Ge(1)-Cl(2) 97.02(5), Cl(3)-Ge(1)-Cl(1) 93.52(4), Cl(2)-Ge(1)-Cl(1) 95.97(5), N(2)-C(1)-N(1) 117.6(3).

**Crystal data for [(Priso)GeGa(I<sub>0.6</sub>/Cl<sub>0.4</sub>)(Giso)]:** C<sub>68</sub>H<sub>104</sub>Cl<sub>0.4</sub>GaGeI<sub>0.6</sub>N<sub>6</sub>,  $a = 10.482(2)$  Å,  $b = 30.477(6)$  Å,  $c = 20.832(4)$  Å,  $\beta = 97.87(3)^\circ$ , monoclinic,  $P2_1/c$ ,  $Z = 4$ ,  $V = 6592(2)$  Å<sup>3</sup>,  $FW = 1238.20$ ,  $D_c = 1.248$  gcm<sup>-3</sup>,  $F(000) = 2622$ ,  $\mu(\text{Mo-K}\alpha) = 1.205$  mm<sup>-1</sup>, 150(2) K, 11567 unique reflections [ $R(\text{int})$  0.0439],  $R$  (on F) 0.0469,  $wR$  (on F<sup>2</sup>) 0.0974 (all data).

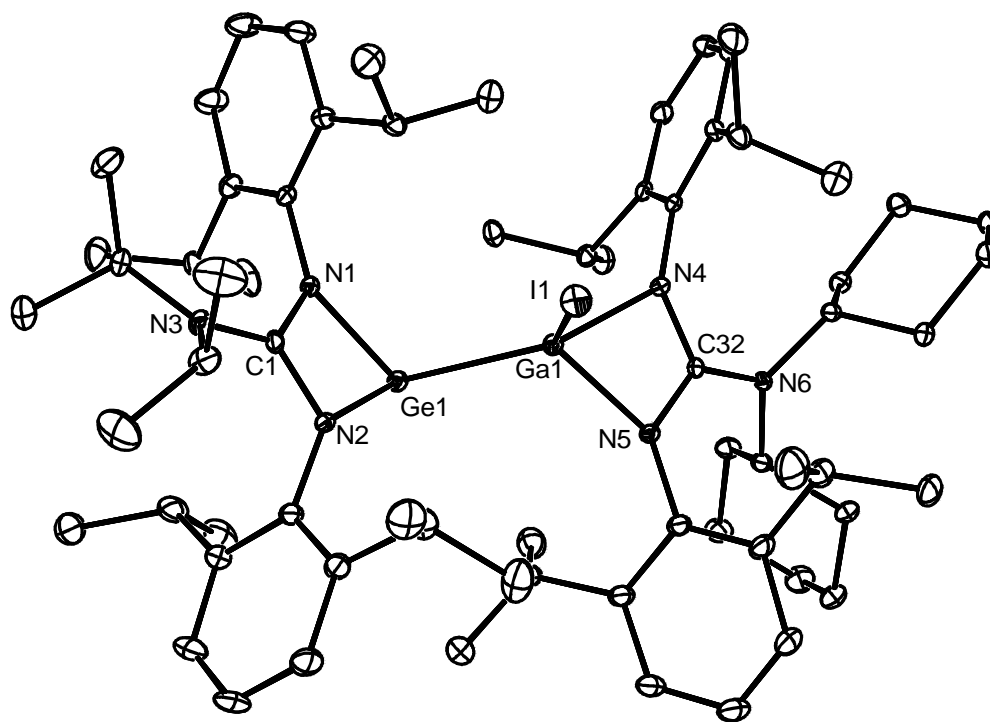

**Figure S2.** Molecular structure of [(Priso)GeGa(I<sub>0.6</sub>/Cl<sub>0.4</sub>)(Giso)] showing only the iodide component of the disordered halide site (25% thermal ellipsoids are shown). Selected bond lengths (Å) and angles (°): I(1)-Ga(1) 2.6298(15), Ge(1)-N(1) 2.017(3), Ge(1)-N(2) 2.024(3), Ge(1)-Ga(1) 2.5921(6), Ga(1)-N(4) 2.032(3), Ga(1)-N(5) 2.033(3), Ga(1)-Cl(1) 2.247(7), N(1)-C(1) 1.343(4), C(1)-N(2) 1.355(4), C(1)-N(3) 1.370(4), N(4)-C(32) 1.361(4), N(4)-C(32) 1.361(4), N(5)-C(32) 1.351(4), N(6)-C(32) 1.376(4), N(1)-Ge(1)-N(2) 65.40(10), N(1)-Ge(1)-Ga(1) 104.26(7), N(2)-Ge(1)-Ga(1) 97.93(8), N(4)-Ga(1)-N(5) 65.35(10), N(4)-Ga(1)-Cl(1) 106.6(3), N(5)-Ga(1)-Cl(1) 112.0(4), N(4)-Ga(1)-Ge(1) 126.91(7), N(5)-Ga(1)-Ge(1) 111.36(7), Cl(1)-Ga(1)-Ge(1) 121.1(3), N(4)-Ga(1)-I(1) 104.96(9), N(5)-Ga(1)-I(1) 111.31(9), Ge(1)-Ga(1)-I(1) 122.66(5), N(1)-C(1)-N(2) 108.0(3), N(5)-C(32)-N(4) 108.1(3).
